# Supplementary material for: Geometry-driven mass transport dynamics within permeable 3D-microstructures fabricated via two-photon polymerization
Source: Royal Society of Chemistry journal article supplement (doi:10.1039/d2tc00331g), 2022-01-01
Supplement: d2tc00331g1.pdf [file d2tc00331g1.pdf]

## Geometry-driven Mass Transport Dynamics within Permeable 3D-Microstructures fabricated by Two-Photon Polymerization.

Rana Mhanna <sup>1</sup>, Ruchun Zhou <sup>2</sup>, Ming Jin\* <sup>2</sup>, Haiyan Pan <sup>2</sup>, Decheng Wan <sup>2</sup>, Davy-Louis Versace <sup>3</sup>, Nelly Hobeika <sup>1</sup>, Amine Khitous, Olivier Soppera <sup>1</sup>, Patrick Lamielle<sup>1</sup>, Jean-Pierre Malval\*<sup>1</sup>.

<sup>1</sup> *Institut de Science des Matériaux de Mulhouse, UMR CNRS 7361, Université de Haute Alsace, 15 rue Jean Starcky, Mulhouse, 68057, France*

<sup>2</sup> *Department of Polymer Materials, School of Materials Science and Engineering, Tongji University, 4800 Caoan Road, Shanghai, 201804, P.R. China*

<sup>3</sup> *Institut de Chimie et des Matériaux Paris-Est, UMR-CNRS 7182, Equipe Systèmes Polymères Complexes, 94320 Thiais, France*

Corresponding authors:

Prof. Ming Jin (e-mail: [mingjin@tongji.edu.cn](mailto:mingjin@tongji.edu.cn))

Prof. Jean-Pierre Malval (e-mail: [jean-pierre.malval@uha.fr](mailto:jean-pierre.malval@uha.fr))

## CONTENTS

- Figure S1.** Comparison of the normalized spectroelectrochemical spectra of (A) radical cations and (B) dications of AMO and AMS in ACN + (nBu)<sub>4</sub>NPF<sub>6</sub> (0.1 M)
- Figure S2.** SEM micrograph of symmetrical 2P induced polymerized lines fabricated for distinctive laser excitation powers ( $\lambda_{ex} = 780$  nm,  $\tau_{exp} = 10$  ms). The star pictogram indicates the corresponding value of  $P_{th}$  at 780 nm. Formulation: Triacrylate resin (PETIA) mixed with AMS (7 mM) and MDEA (25 mM).
- Figure S3.** SEM images of a 2PP fabricated microgear (A : front view, B : view tilted at 45 °). Formulation : PETIA with AMS / MDEA : 7 mM / 25 mM ( $\lambda_{ex} : 780$  nm, P = 5 mW,  $\tau_{exp} = 2$  ms).
- Figure S4.** SEM images of a hollow icosahedral microstructure (A : front view, B : view tilted at 15 °). Formulation : PETIA with AMS / MDEA : 7 mM / 25 mM ( $\lambda_{ex} : 780$  nm, P = 4 mW,  $\tau_{exp} = 2$  ms).
- Figure S5.** SEM images of a waffle-like microstructure (A-C : view tilted at 15 ° B : front view). Formulation : PETIA with AMS / MDEA : 7 mM / 25 mM ( $\lambda_{ex} : 780$  nm, P = 4 mW,  $\tau_{exp} = 2$  ms).
- Figure S6.** Evolution of the fluorescence spectrum of AMS in the triacrylate formulation upon stepwise photopolymerization at 365 nm. Formulation: Triacrylate resin (PETIA) mixed with AMS (7 mM) and MDEA (25 mM). Each fluorescence spectrum was recorded at  $\lambda_{exc.} = 340$  nm.
- Figure S7.** A. Transmitted optical images of a photopolymerized PEGDA dot in air and in ACN solution (scale bar: 40  $\mu$ m). B. Evolution of the fluorescence signal recorded from the excited polymer dot during its incubation in ACN ( $\lambda_{exc.} = 365$  nm). C. Fluorescence

images of the polymer dot recorded in ACN at the initial and final incubation time. Formulation: **PEGDA** mixed with **AMS** (7 mM) and **MDEA** (25 mM).

- Figure S8.** Evolution of the fluorescence signals from the excitation of two-photon patterned structures (20 x 20  $\mu\text{m}$  square planes) during their incubation in ACN. The fluorescence images of each microstructure were recorded *in situ* before and after the kinetics. **A.** Microstructure based on formulation with **AMS** (7 mM) and **MDEA** (25 mM) ( $\lambda_{\text{exc.}} = 365$  nm). **B.** Microstructure based on formulation with **Rhodamine B** (8 mM) and **MDEA** (25 mM) ( $\lambda_{\text{exc.}} = 485$  nm). Inset: Fluorescence spectrum of the surrounding solvent recorded after the incubation of the microstructure with **Rhodamine B**. All structures were two-photon patterned at  $\lambda_{\text{ex}}$ : 780 nm ( $P = 15$  mW,  $\tau_{\text{exp}} = 2$  ms).
- Figure S9.** AFM images of a dried two-photon polymerized square plane with 50  $\mu\text{m}$  side. The fluorescence of the microstructure has been initially quenched upon incubation in an ACN solution of copper (II) cations ( $10^{-4}$  M). **A.** AFM topographic image. **B.** AFM height image.
- Figure S10.** Fluorescence quenching kinetics recorded at different  $X/L_{\text{MAX}}$  coordinates for each  $\mu\text{m}$ -structure. Insets: Initial fluorescence image with the  $x$ -axis referential and master 3D-image of the corresponding  $\mu\text{m}$ -structure.
- Scheme S1.** **A.** Scheme of the PTFE chamber. **B.** Time-dependent fluorescence intensity changes relative to three similar squares planes with a thickness of 1.75  $\mu\text{m}$ .
- Scheme S2.** Molecular structures of the acrylate-based monomers.

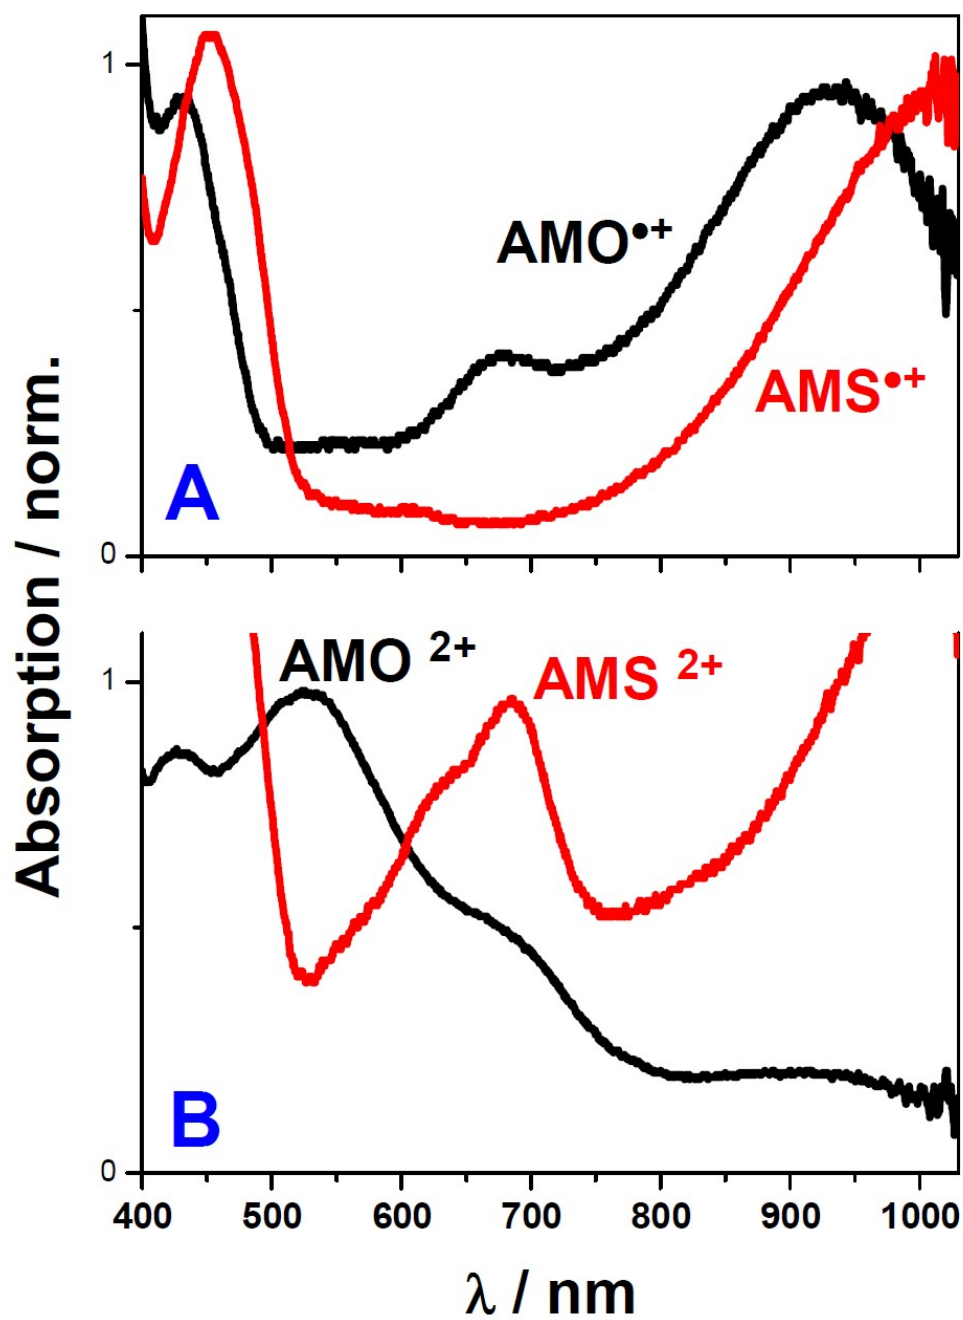

**Figure S1.** Comparison of the normalized spectroelectrochemical spectra of (A) radical cations and (B) dications of AMO and AMS in ACN + (nBu)<sub>4</sub>NPF<sub>6</sub> (0.1 M)

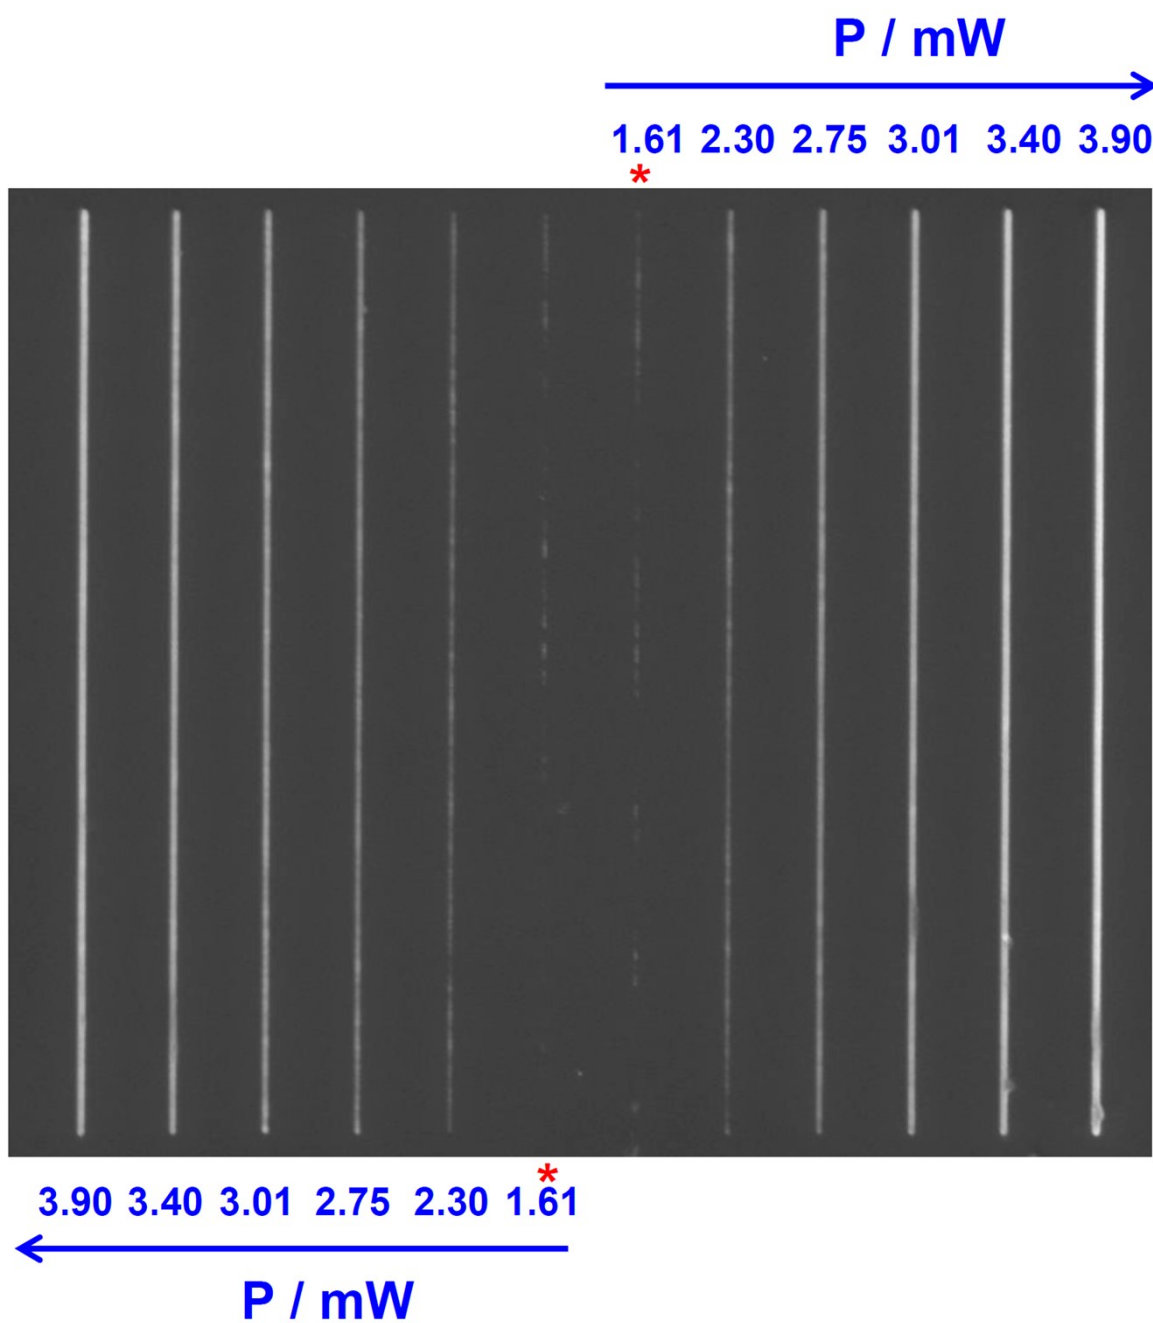

**Figure S2.** SEM micrograph of symmetrical 2P induced polymerized lines fabricated for distinctive laser excitation powers ( $\lambda_{ex} = 780 \text{ nm}$ ,  $\tau_{exp} = 10 \text{ ms}$ ). The star pictogram indicates the corresponding value of  $P_{th}$  at 780 nm. Formulation: Triacrylate resin (**PETIA**) mixed with **AMS** (7 mM) and **MDEA** (25 mM).

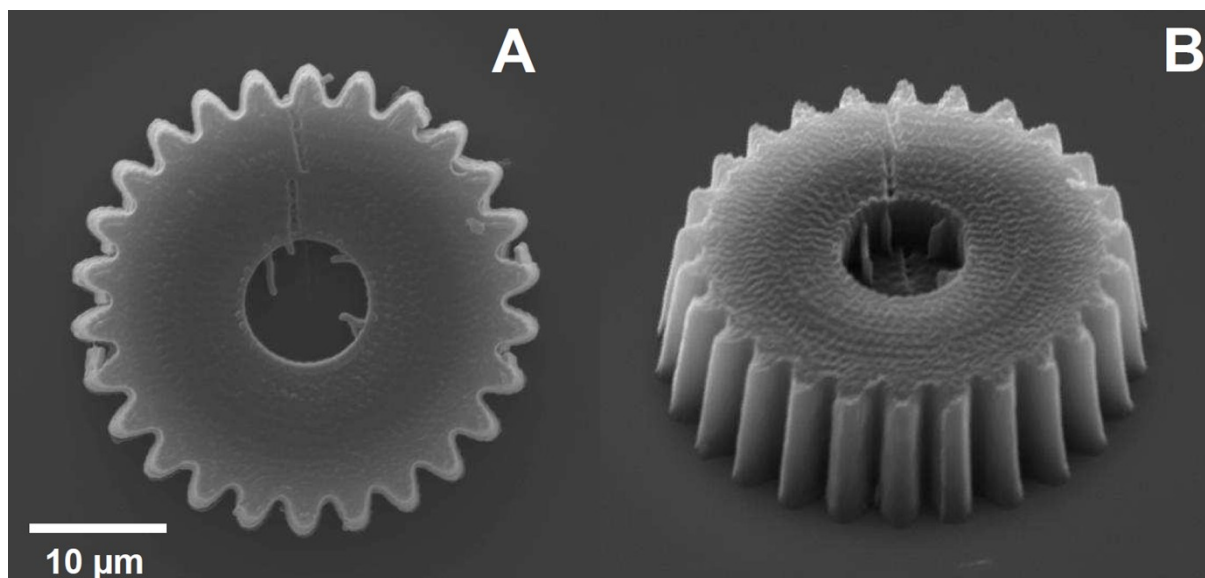

**Figure S3.** SEM images of a 2PP fabricated microgear (**A** : front view, **B** : view tilted at 45 °). Formulation : **PETIA** with **AMS** / **MDEA** : 7 mM / 25 mM ( $\lambda_{\text{ex}}$  : 780 nm,  $P = 5$  mW,  $\tau_{\text{exp}} = 2$  ms).

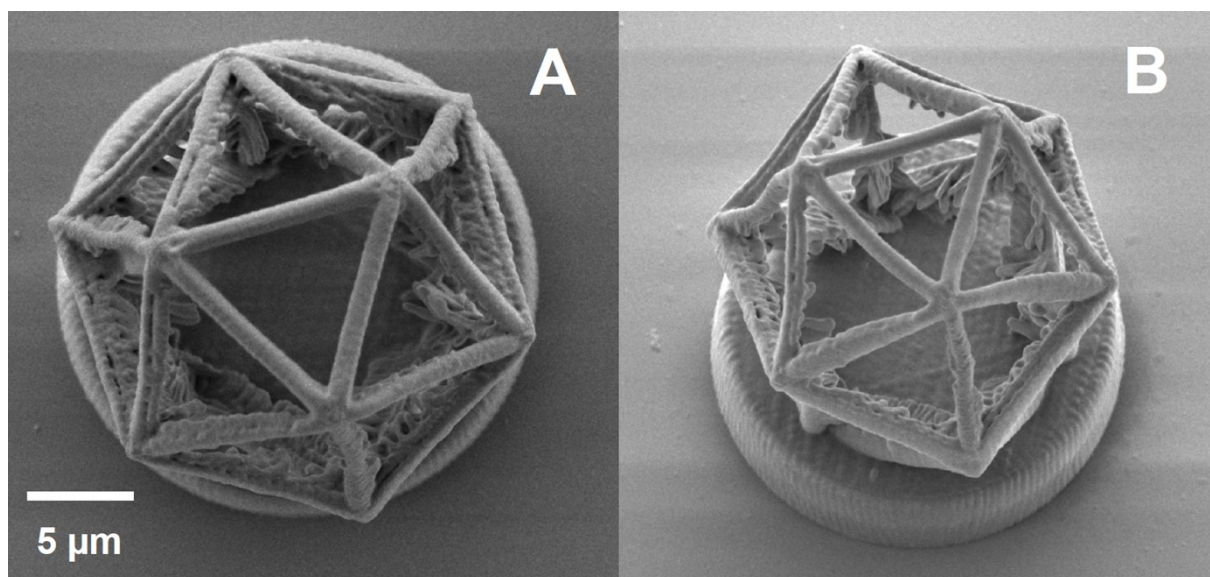

**Figure S4.** SEM images of a hollow icosahedral microstructure (**A** : front view, **B** : view tilted at 15 °). Formulation : **PETIA** with **AMS** / **MDEA** : 7 mM / 25 mM ( $\lambda_{\text{ex}}$  : 780 nm,  $P = 4$  mW,  $\tau_{\text{exp}} = 2$  ms).

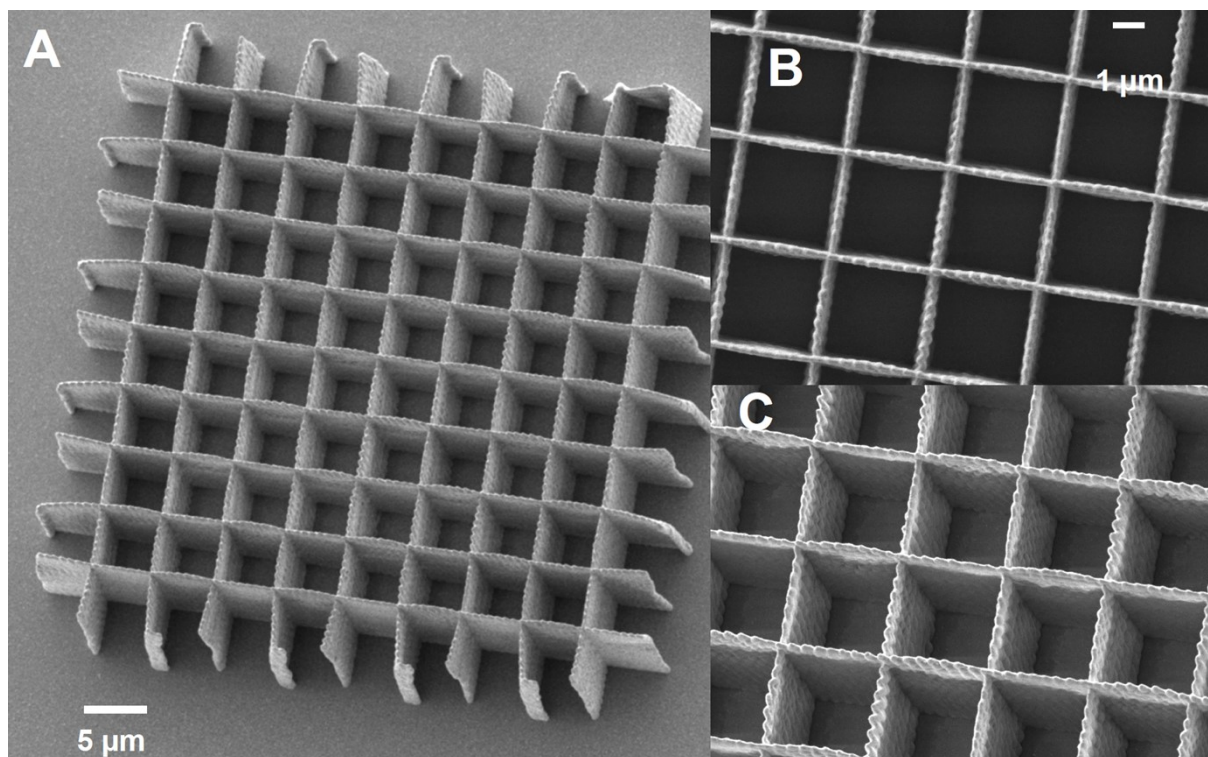

**Figure S5.** SEM images of a waffle-like microstructure (**A-C** : view tilted at  $15^\circ$  **B** : front view). Formulation : **PETIA** with **AMS** / **MDEA** : 7 mM / 25 mM ( $\lambda_{\text{ex}}$  : 780 nm,  $P = 4$  mW,  $\tau_{\text{exp}} = 2$  ms).

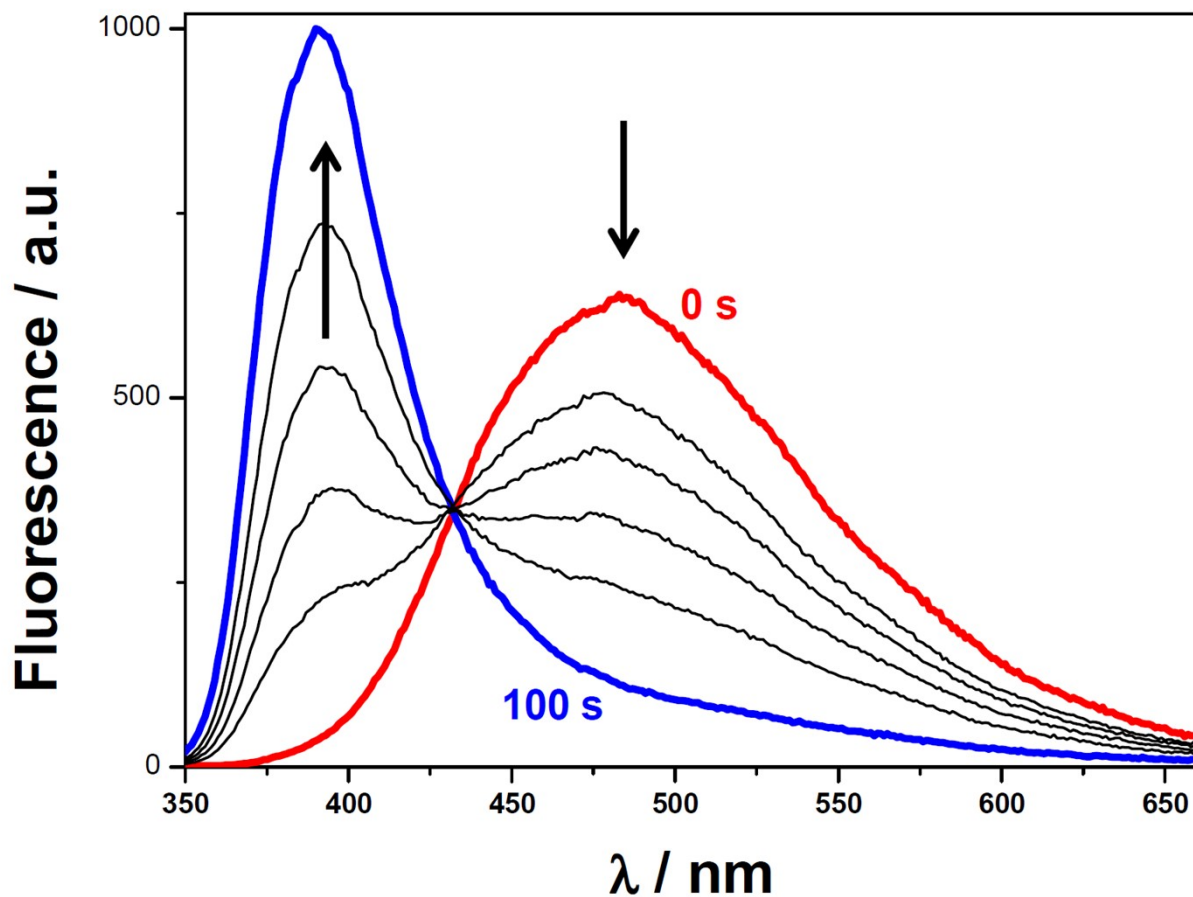

**Figure S6.** Evolution of the fluorescence spectrum of **AMS** in the triacrylate formulation upon stepwise photopolymerization at 365 nm. Formulation: Triacrylate resin (**PETIA**) mixed with **AMS** (7 mM) and **MDEA** (25 mM). Each fluorescence spectrum was recorded at  $\lambda_{exc.} = 340$  nm.



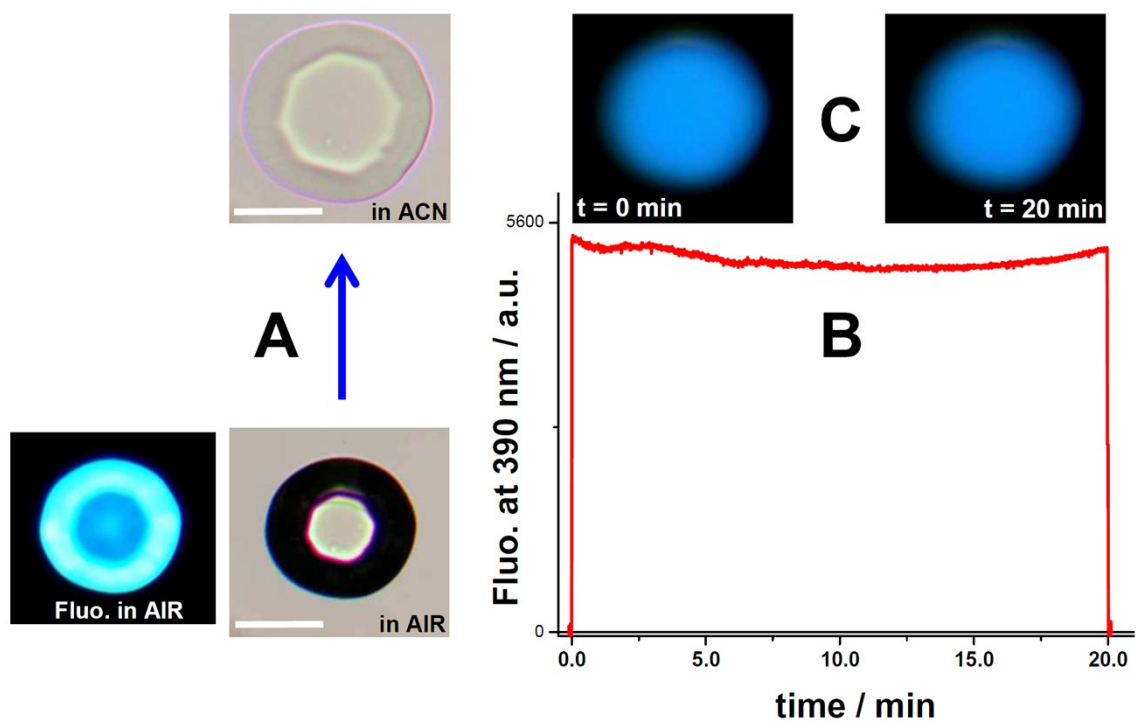

**Figure S7.** **A.** Transmitted optical images of a photopolymerized **PEGDA** dot in air and in ACN solution (scale bar: 40  $\mu\text{m}$ ). **B.** Evolution of the fluorescence signal recorded from the excited polymer dot during its incubation in ACN ( $\lambda_{\text{exc.}} = 365 \text{ nm}$ ). **C.** Fluorescence images of the polymer dot recorded in ACN at the initial and final incubation time. Formulation: **PEGDA** mixed with **AMS** (7 mM) and **MDEA** (25 mM).

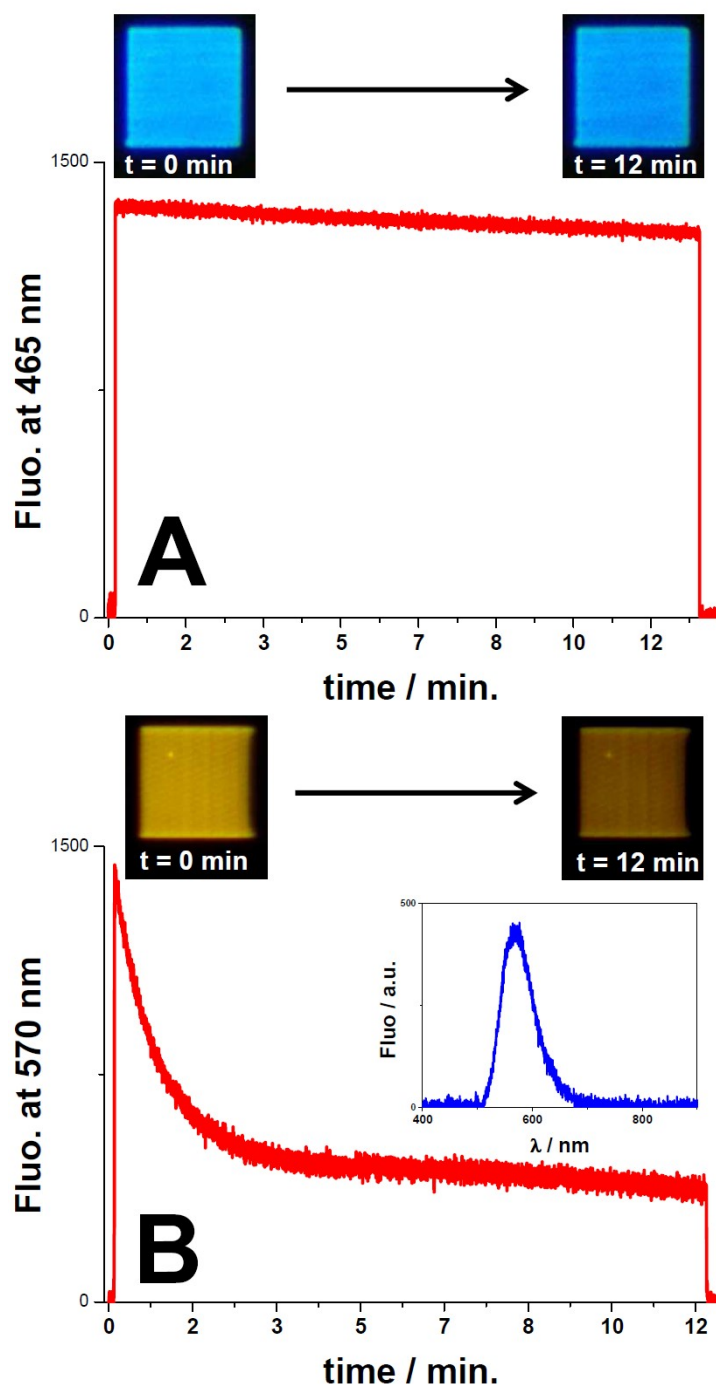

**Figure S8.** Evolution of the fluorescence signals from excited two-photon patterned structures ( $20 \times 20 \mu\text{m}$  square planes) during their incubation in ACN. The fluorescence images of each microstructure were recorded *in situ* before and after the kinetics. **A.** Microstructure based on the formulation with **AMS** (7 mM) and **MDEA** (25 mM) ( $\lambda_{\text{exc.}} = 365$  nm). **B.** Microstructure based on the formulation with **RhB** (8 mM) and **MDEA** (25 mM) ( $\lambda_{\text{exc.}} = 485$  nm). Inset: Fluorescence spectrum of the surrounding solvent recorded after the incubation of the microstructure with **RhB**. All structures were two-photon patterned at  $\lambda_{\text{ex}} : 780$  nm ( $P = 15$  mW,  $\tau_{\text{exp}} = 2$  ms).

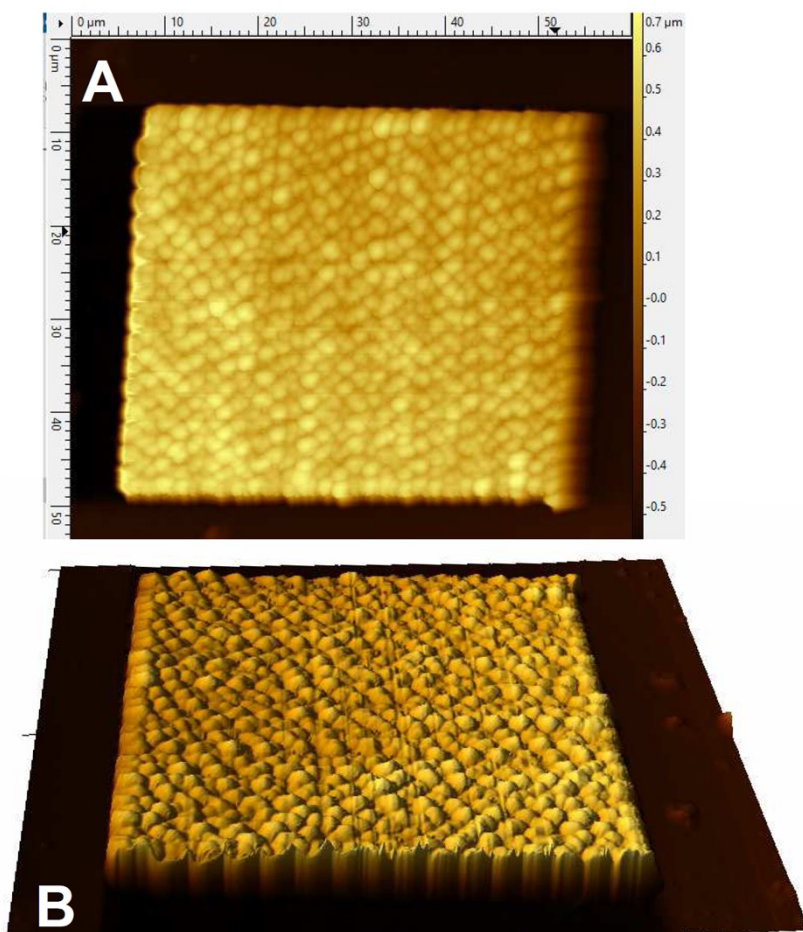

**Figure S9.** AFM images of a dried two-photon polymerized square plane with 50  $\mu\text{m}$  side. The fluorescence of the microstructure has been initially quenched upon incubation in an ACN solution of copper (II) cations ( $10^{-4}$  M). **A.** AFM topographic image. **B.** AFM height image.

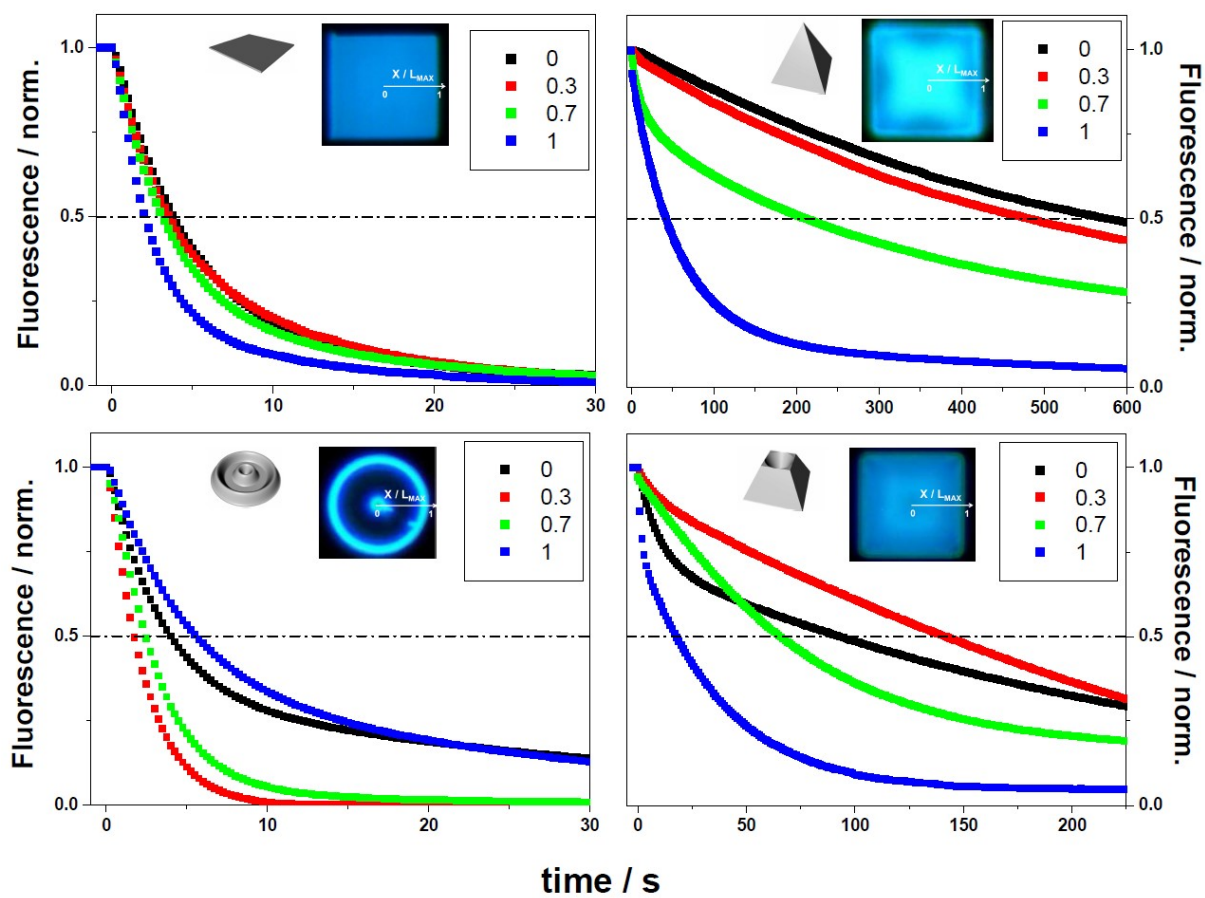

**Figure S10.** Fluorescence quenching kinetics recorded at different  $X/L_{\text{MAX}}$  coordinates for each  $\mu\text{m}$ -structure. Insets: Initial fluorescence image with the  $x$ -axis referential and master 3D-image of the corresponding  $\mu\text{m}$ -structure.

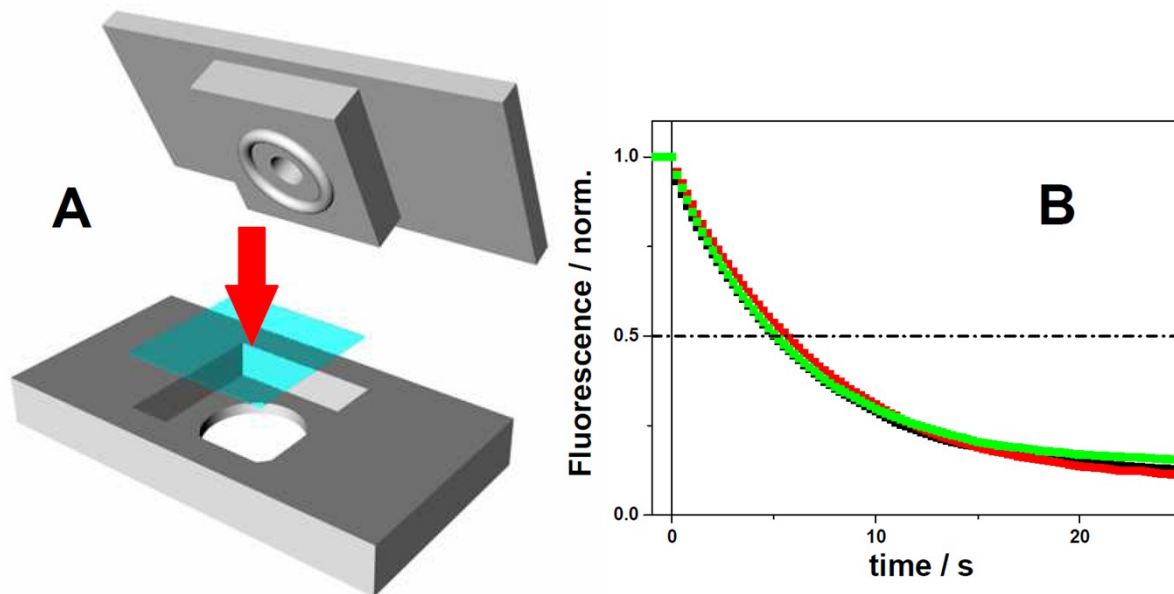

**Scheme S1.** **A.** Scheme of the PTFE chamber. **B.** Time-dependent fluorescence intensity changes relative to three similar squares planes with a thickness of  $1.75 \mu\text{m}$ .

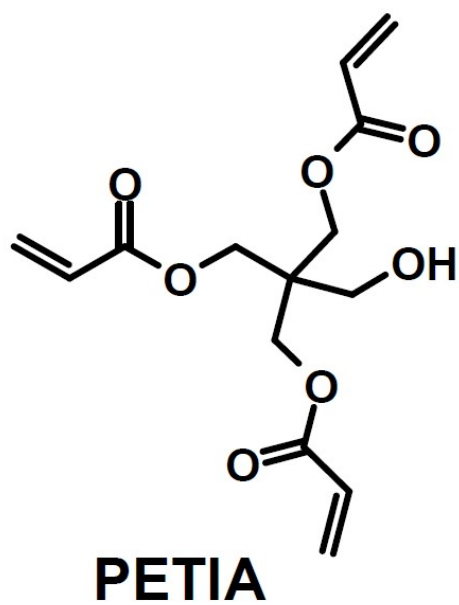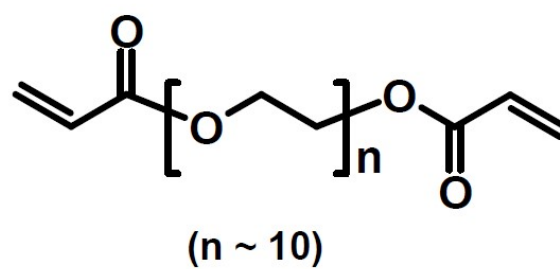

**Scheme S2.** Molecular structures of the acrylate-based monomers.
